# Supplementary material for: Patients’ and Clinicians’ Perceived Trust in Internet-of-Things Systems to Support Asthma Self-management: Qualitative Interview Study
Source: PubMed Central journal article supplement (PMC8325078; doi:10.2196/24127), 2021-07-16

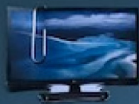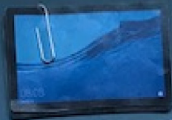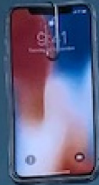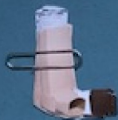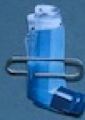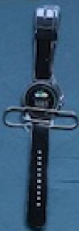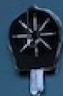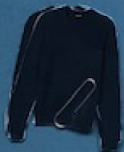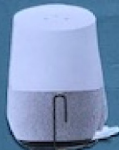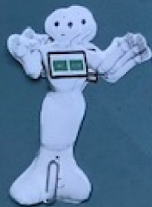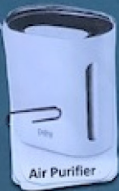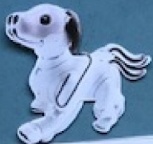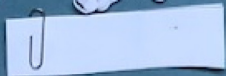

Petal flow 

Pollen 

Coughing 

Air temperature 

Stress 

Air pollution 

Activity path 

Dust 

FeNO 

Humidity 

Exercise intensity 

Steady course logs 

Sleep pattern 

Inhaler technique 

Flu vaccine taken 

Medication for other conditions 

Smoking cessation 

Animal fur or feathers 

No. of puffs (blue inhaler) 

No. of puffs (brown inhaler) 

Supplement: mhealth_v9i7e24127_app1.pdf [file mhealth_v9i7e24127_app1.pdf]
